# Supplementary material for: A High-Performance Computing Implementation of Iterative Random Forest for the Creation of Predictive Expression Networks
Source: MDPI journal article supplement (doi:10.3390/genes10120996), 2019-12-02
Supplement: s1 [file s1]

## Supplementary Information

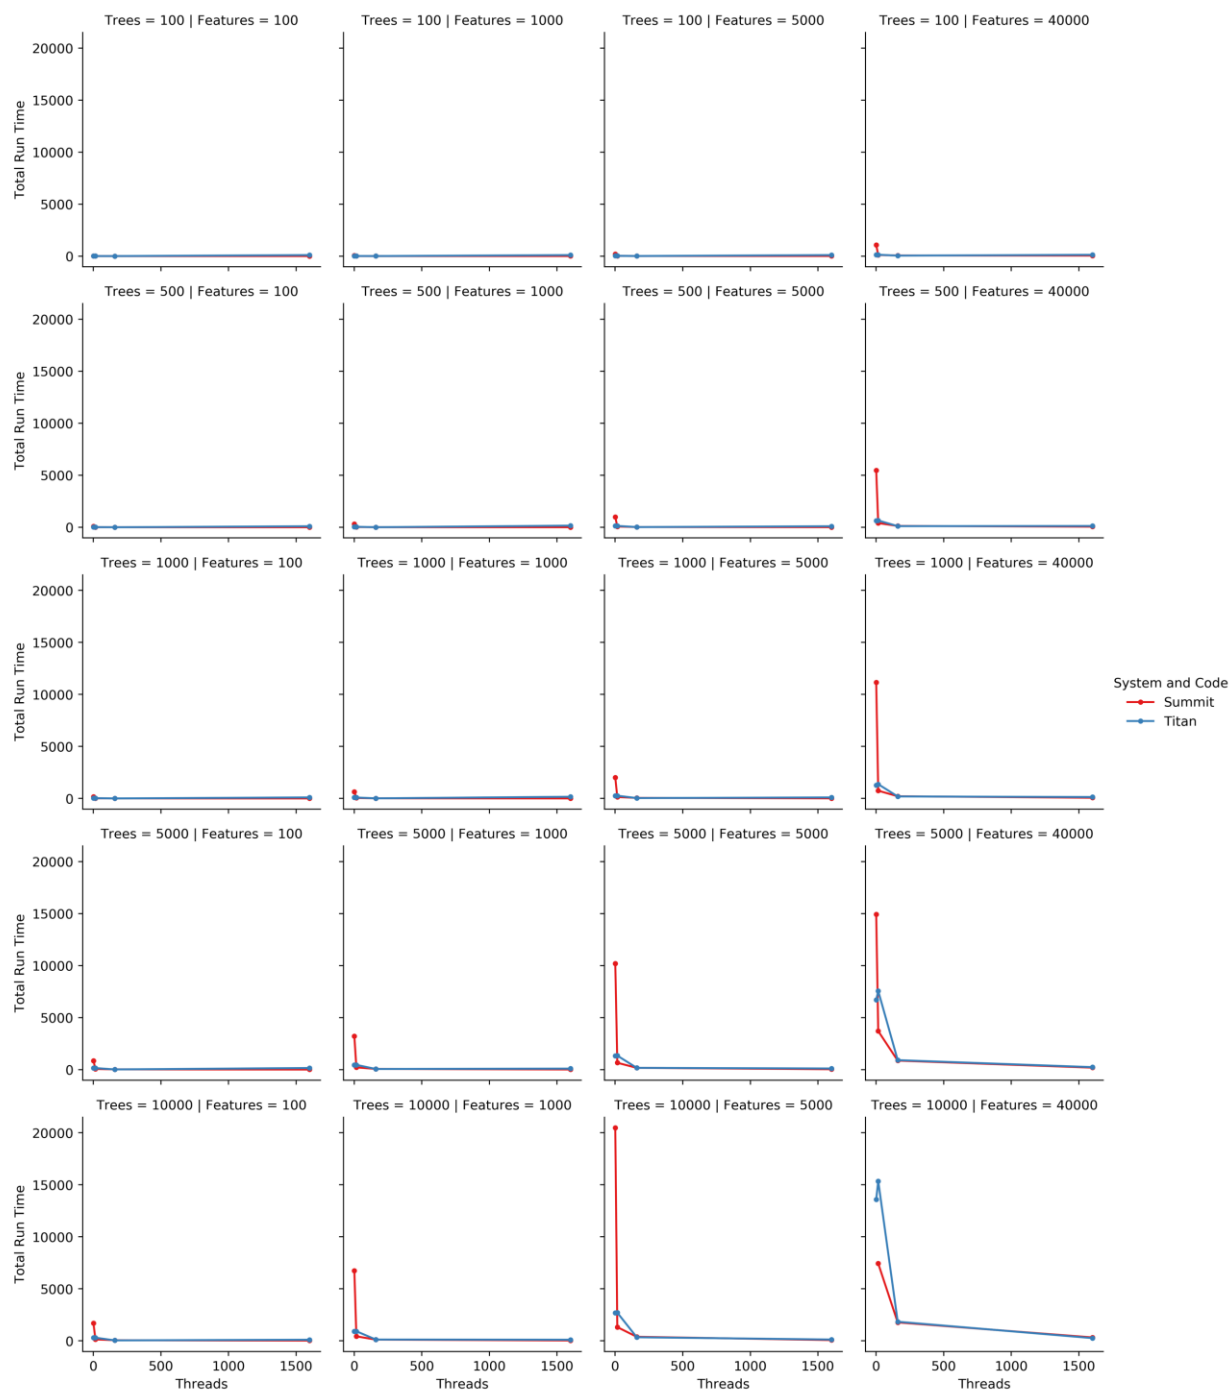

**Figure S1.** Runtime on HPC Systems. The full grid of graphs comparing Summit and Titan times to completion for the C++ code. The red line is for Summit and the blue line is for Titan.

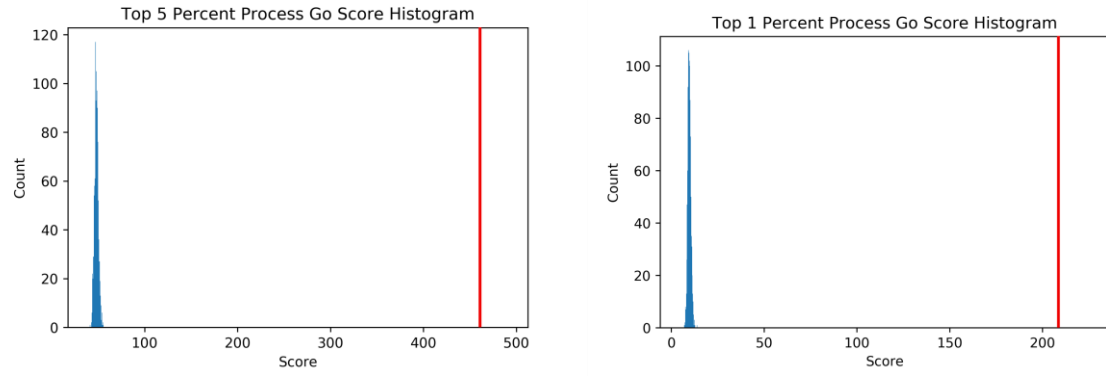

**Figure S2.** Null Distribution Plots. Null distributions with iRF intersect scores in red for the two thresholded Predictive Expression Networks not shown in the main text.

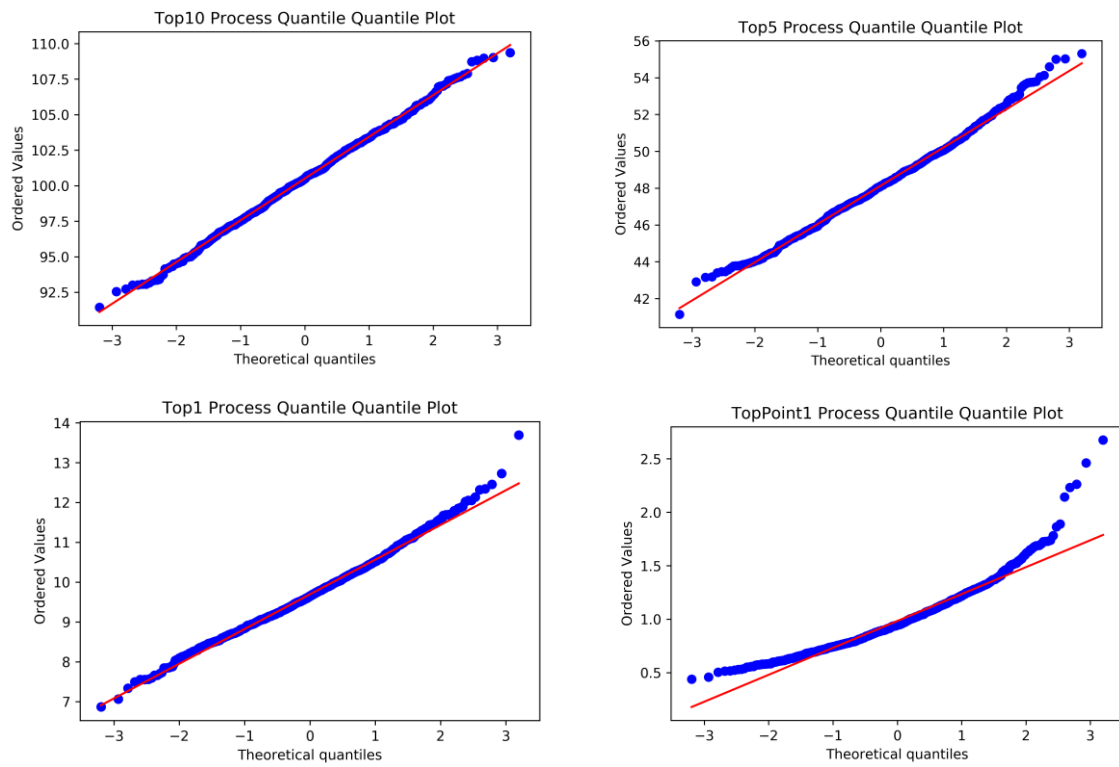

**Figure S3.** Quantile-Quantile Plots for the PENs. Quantile-quantile plots for each null distribution of the thresholded Predictive Expression Networks. .
